# Supplementary material for: Evaluating The Knowledge of Breast Cancer Risk Factors and Screening Methods among Community Health Workers in Kicukiro District, Rwanda: A cross-sectional study
Source: Research Square preprint supplement (doi:10.21203/rs.3.rs-6506896/v1), 2025-08-06
Supplement: Supplementary file 1 [file 2bb059ae25f55054eb66749e.pdf]

|                                                                                |                     | Count | Table N<br>% |
|--------------------------------------------------------------------------------|---------------------|-------|--------------|
| Age                                                                            | 18-25               | 6     | 3.3%         |
|                                                                                | 25-30               | 18    | 9.8%         |
|                                                                                | 30-35               | 42    | 23.0%        |
|                                                                                | Above 35            | 117   | 63.9%        |
| sex                                                                            | Male                | 48    | 26.2%        |
|                                                                                | Female              | 135   | 73.8%        |
| The health center<br>participant work in                                       | Masaka              | 100   | 54.6%        |
|                                                                                | Gikondo             | 83    | 45.4%        |
| Type of community health<br>worker                                             | Binômes             | 108   | 59.0%        |
|                                                                                | ASM                 | 43    | 23.5%        |
|                                                                                | Health<br>promotion | 32    | 17.5%        |
| Level of education                                                             | Primary level       | 72    | 39.3%        |
|                                                                                | Ordinary level      | 57    | 31.1%        |
|                                                                                | Advanced level      | 39    | 21.3%        |
|                                                                                | Diploma             | 9     | 4.9%         |
|                                                                                | Bachelor            | 6     | 3.3%         |
| Experience                                                                     | 3 months-2<br>years | 56    | 30.6%        |
|                                                                                | 3years-4years       | 37    | 20.2%        |
|                                                                                | 5years-6years       | 20    | 10.9%        |
|                                                                                | 7years-8years       | 18    | 9.8%         |
|                                                                                | 8years-9years       | 11    | 6.0%         |
|                                                                                | 9years-10years      | 6     | 3.3%         |
|                                                                                | Above 10 years      | 35    | 19.1%        |
| Have you ever trained<br>about the risks and<br>prevention of breast<br>cancer | Yes                 | 98    | 53.6%        |
|                                                                                | No                  | 85    | 46.4%        |

|                 | Count | Table N<br>% |
|-----------------|-------|--------------|
| Mean of the age |       |              |

## Descriptive Statistics

|                         | N   | Minimum | Maximum | Mean   | Std.<br>Deviation |
|-------------------------|-----|---------|---------|--------|-------------------|
| Age of the participants | 183 | 1.00    | 4.00    | 3.4754 | .80397            |
| Valid N (listwise)      | 183 |         |         |        |                   |

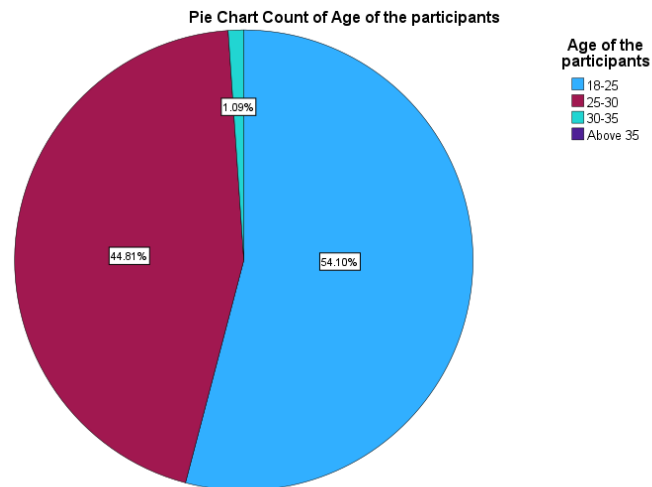

|                         |     | Risk factors |              |
|-------------------------|-----|--------------|--------------|
|                         |     | Count        | Table N<br>% |
| Increasing age          | Yes | 72           | 39.3%        |
|                         | No  | 111          | 60.7%        |
| Positive family history | Yes | 64           | 35.0%        |
|                         | No  | 119          | 65.0%        |
| High fat diet           | Yes | 66           | 36.1%        |
|                         | No  | 117          | 63.9%        |
| Smoking                 | Yes | 147          | 80.3%        |
|                         | No  | 36           | 19.7%        |
| Alcohol consumption     | Yes | 109          | 59.6%        |
|                         | No  | 74           | 40.4%        |
| First child at late age | Yes | 41           | 22.4%        |
|                         | No  | 142          | 77.6%        |
| Early onset of menarche | Yes | 15           | 8.2%         |
|                         | No  | 168          | 91.8%        |
| Late menopause          | Yes | 34           | 18.6%        |
|                         | No  | 149          | 81.4%        |
| Stress                  | Yes | 55           | 30.1%        |
|                         | No  | 128          | 69.9%        |

|                                 |     |     |       |
|---------------------------------|-----|-----|-------|
| Larger breast                   | Yes | 28  | 15.3% |
|                                 | No  | 155 | 84.7% |
| Use of oral contraceptive pills | Yes | 49  | 26.8% |
|                                 | No  | 134 | 73.2% |
| Physical inactivity             | Yes | 85  | 46.4% |
|                                 | No  | 98  | 53.6% |
| Woman who do not breastfeed     | Yes | 79  | 43.2% |
|                                 | No  | 104 | 56.8% |
| Obesity                         | Yes | 89  | 48.6% |
|                                 | No  | 94  | 51.4% |
| Radiation                       | Yes | 85  | 46.4% |
|                                 | No  | 98  | 53.6% |

### Descriptive Statistics

|                        | N   | Minimum | Maximum | Mean    | Std. Deviation |
|------------------------|-----|---------|---------|---------|----------------|
| Total for risk factors | 183 | 15.00   | 28.00   | 22.5902 | 2.75986        |
| Valid N (listwise)     | 183 |         |         |         |                |

|                                                         |     | Count | Table N % |
|---------------------------------------------------------|-----|-------|-----------|
| Self breast examination                                 | Yes | 150   | 82.0%     |
|                                                         | No  | 33    | 18.0%     |
| Pathological examination of breast tissue by using FNAC | Yes | 150   | 82.0%     |
|                                                         | No  | 33    | 18.0%     |
| Clinical Breast Examination by a doctor                 | Yes | 158   | 86.3%     |
|                                                         | No  | 25    | 13.7%     |
| Mammography                                             | Yes | 131   | 71.6%     |
|                                                         | No  | 52    | 28.4%     |

### Descriptive Statistics

|  | N | Minimum | Maximum | Mean | Std. Deviation |
|--|---|---------|---------|------|----------------|
|--|---|---------|---------|------|----------------|

|                          |     |      |      |        |         |
|--------------------------|-----|------|------|--------|---------|
| knowledge for prevention | 183 | 4.00 | 8.00 | 4.7814 | 1.13693 |
| Valid N (listwise)       | 183 |      |      |        |         |

|                         |              | Count | Table N % |
|-------------------------|--------------|-------|-----------|
| howoftenSBEshouldbedone | Monthly      | 44    | 24.0%     |
|                         | Twice a year | 66    | 36.1%     |
|                         | Once a year  | 53    | 29.0%     |
|                         | Don't Know   | 20    | 10.9%     |

## Preventive methods

**Table 2**

| Variables                                               |     | Response | Percent |
|---------------------------------------------------------|-----|----------|---------|
| Self-breast examination                                 | Yes | 150      | 82.00%  |
|                                                         | No  | 33       | 18.00%  |
| Pathological examination of breast tissue by using FNAC | Yes | 150      | 82.00%  |
|                                                         | No  | 33       | 18.00%  |
| Clinical Breast Examination by a doctor                 | Yes | 158      | 86.30%  |
|                                                         | No  | 25       | 13.70%  |
| Mammography                                             | Yes | 131      | 71.60%  |
|                                                         | No  | 52       | 28.40%  |

**Table 3**

| Variables                                                          |                                                         | Participant's response | Percent |
|--------------------------------------------------------------------|---------------------------------------------------------|------------------------|---------|
| How often SBE should be done                                       | Monthly                                                 | 44                     | 24.00%  |
|                                                                    | Twice a year                                            | 66                     | 36.10%  |
|                                                                    | Once a year                                             | 53                     | 29.00%  |
|                                                                    | Don't Know                                              | 20                     | 10.90%  |
| The methods used                                                   | In front of mirror                                      | 42                     | 23.00%  |
|                                                                    | During shower                                           | 51                     | 27.90%  |
|                                                                    | Lying down                                              | 56                     | 30.60%  |
|                                                                    | None of them                                            | 34                     | 18.60%  |
| The motion do participant use in examination of your breast        | Circular                                                | 48                     | 26.20%  |
|                                                                    | Wedge                                                   | 56                     | 30.60%  |
|                                                                    | None                                                    | 79                     | 43.20%  |
| The recommended age for starting mammography                       | At the age of 30                                        | 47                     | 25.70%  |
|                                                                    | At 35                                                   | 68                     | 37.20%  |
|                                                                    | At 45-year                                              | 28                     | 15.30%  |
|                                                                    | Don't know                                              | 40                     | 21.90%  |
| Do you often participate in some prevention methods for the people | Yes                                                     | 130                    | 71.00%  |
|                                                                    | No                                                      | 53                     | 29.00%  |
| Methods for those who participate in prevention methods            | Self-breast examination                                 | 72                     | 54.10%  |
|                                                                    | Pathological examination of breast tissue by using FNAC | 13                     | 9.80%   |

|  |                                         |    |        |
|--|-----------------------------------------|----|--------|
|  | Clinical Breast Examination by a doctor | 35 | 26.30% |
|  | Mammography                             | 13 | 9.80%  |

|                |                    | Count | Table N % |
|----------------|--------------------|-------|-----------|
| Themethodsused | In front of mirror | 42    | 23.0%     |
|                | During shower      | 51    | 27.9%     |
|                | Lying down         | 56    | 30.6%     |
|                | None of them       | 34    | 18.6%     |

|                                            |          | Count | Table N % |
|--------------------------------------------|----------|-------|-----------|
| Themotiondoyouuseinexaminationofyourbreast | Circular | 48    | 26.2%     |
|                                            | Wedge    | 56    | 30.6%     |
|                                            | None     | 74    | 40.4%     |
|                                            | 4.00     | 5     | 2.7%      |

|                                                          |      | Count | Table N % |
|----------------------------------------------------------|------|-------|-----------|
| Doyouoftenparticipateinsomepreventionmethodsforthepeople | Yes  | 129   | 70.5%     |
|                                                          | No   | 53    | 29.0%     |
|                                                          | 3.00 | 1     | 0.5%      |

## Correlation

| Variables | Age | Gender | Health centers working in | Type of community health worker | Educational level? | Experience as a community health worker | Ever trained about the risks and prevention of breast cancer |
|-----------|-----|--------|---------------------------|---------------------------------|--------------------|-----------------------------------------|--------------------------------------------------------------|
|-----------|-----|--------|---------------------------|---------------------------------|--------------------|-----------------------------------------|--------------------------------------------------------------|

|                                 |       |        |        |        |         |        |        |
|---------------------------------|-------|--------|--------|--------|---------|--------|--------|
| Positive family history         | 0.039 | -0.011 | 0.036  | 0.049  | -0.016  | -.166* | .145*  |
| High fat diet                   | 0.005 | 0.096  | 0.046  | -0.056 | -0.1    | -0.128 | 0.105  |
| Smoking                         | 0.078 | 0.038  | 0.057  | 0.063  | -0.106  | -0.083 | -0.025 |
| Alcohol consumption             | 0.003 | 0.127  | 0.038  | 0.081  | 0.059   | -0.05  | -0.053 |
| First child at late age         | 0.055 | 0.078  | -0.006 | 0.013  | -0.062  | -0.046 | 0.049  |
| Early onset of menarche         | 0.037 | -0.016 | 0.023  | -0.083 | -0.133  | -0.081 | .166*  |
| Late menopause                  | 0.008 | 0.021  | -0.011 | -0.074 | -0.017  | -0.052 | 0.011  |
| Stress                          | -.053 | .153*  | 0.022  | 0.023  | -.222** | -0.085 | -0.069 |
| Larger breast                   | -.001 | .305** | -0.007 | 0.114  | 0.078   | 0.047  | -0.029 |
| Use of oral contraceptive pills | -.105 | 0.03   | -0.142 | 0.079  | -0.069  | 0.065  | -0.116 |
| Physical inactivity             | -.009 | .150*  | -0.055 | 0.071  | -0.137  | -0.03  | -0.06  |
| Woman who does not breastfeed   | 0.108 | 0.03   | -0.01  | 0.062  | -0.137  | 0.06   | -0.094 |
| Obesity                         | 0.128 | 0.099  | 0.086  | 0.098  | -0.058  | -0.076 | -0.062 |
| Radiation exposure              | -.068 | 0.124  | -0.001 | 0.081  | -0.126  | -0.051 | 0.093  |

\*\* . Correlation is significant at the 0.01 level (2-tailed).

\* . Correlation is significant at the 0.05 level (2-tailed).
