# Supplementary material for: Evaluating The Knowledge of Breast Cancer Risk Factors and Screening Methods among Community Health Workers in Kicukiro District, Rwanda: A cross-sectional study
Source: Research Square preprint supplement (doi:10.21203/rs.3.rs-6506896/v1), 2025-08-06
Supplement: Supplementary file 2 [file db148ed865ddca59cee963c3.pdf]

**Questionnaire: English version**

**Evaluating The Knowledge of Breast Cancer Risk Factors and Screening Methods among Community Health Workers  
in Kicukiro District, Rwanda: A cross-sectional study**

**Section 1: Socio-demographic characteristics**

1. Age

a)18-25 ☐

b)25-30 ☐

c) 30-35 ☐

d) above 35 ☐

2. Gender. M ☐ F ☐

3. Health centers he /she is working in

a) Masaka Health Center ☐

b) Gikondo Health Center ☐

4. Which type of community health worker are you?

a) Binômes ☐

b) ASM ☐

c) C)Health promotion ☐

5. What is your educational level?

a) Primary level ☐

b) level ☐

c) Diploma ☐

d) Bachelor ☐

6. Experience as a community health worker

- a) One-two years ☐
- b) Two – four years ☐
- c) Four-six years ☐
- d) six-eight years ☐
- e) eight-10 years ☐
- f) above 10 years

7. Have you ever trained about the risks and prevention of breast cancer

a) yes ☐

b) no ☐

## Section II. The level of knowledge about different breast cancer risk factors

8. Please identify the factors which you think is a potential risk factors for developing (more than one answer in acceptable)

|                            |                                                                    |
|----------------------------|--------------------------------------------------------------------|
| a. Increasing age          | I. Yes <input type="checkbox"/><br>II. no <input type="checkbox"/> |
| b. Positive family history | I. Yes <input type="checkbox"/><br>II. no <input type="checkbox"/> |
| c. High fat diet           | I. Yes <input type="checkbox"/><br>II. no <input type="checkbox"/> |
| d. Smoking                 | I. Yes <input type="checkbox"/><br>II. no <input type="checkbox"/> |
| e. Alcohol consumption     | I. Yes <input type="checkbox"/><br>II. no <input type="checkbox"/> |
| f. First child at late age | I. Yes <input type="checkbox"/><br>II. <input type="checkbox"/> no |
| g. Early onset of menarche | I. Yes <input type="checkbox"/>                                    |

|                                    |                                                                               |
|------------------------------------|-------------------------------------------------------------------------------|
|                                    | II. no <input type="checkbox"/>                                               |
| h. Late menopause                  | I. Yes <input type="checkbox"/><br>II. <input checked="" type="checkbox"/> no |
| i. Stress                          | I. Yes <input type="checkbox"/><br>II. no <input type="checkbox"/>            |
| j. Larger breast                   | I. Yes <input type="checkbox"/><br>II. no <input type="checkbox"/>            |
| k. Use of oral contraceptive pills | I. Yes <input type="checkbox"/><br>II. no <input type="checkbox"/>            |
| l. Physical inactivity             | I. Yes <input type="checkbox"/><br>II. <input checked="" type="checkbox"/> no |
| m. Woman who do not breastfeed     | I. Yes <input type="checkbox"/><br>II. <input checked="" type="checkbox"/> no |
| n. Obesity                         | I. Yes <input type="checkbox"/><br>II. <input checked="" type="checkbox"/> no |
| o. Radiation exposure (Specify)_   | I. Yes <input type="checkbox"/><br>II. <input type="checkbox"/>               |

## Section II. The level of knowledge about different screening methods of breast cancer

9. From the following identify the methods used in breast cancer prevention

|    |                                                                                           |                                                                    |
|----|-------------------------------------------------------------------------------------------|--------------------------------------------------------------------|
| a. | Self-breast examination                                                                   | I. Yes <input type="checkbox"/><br>II. NO <input type="checkbox"/> |
| b. | Pathological examination of breast tissue by using FNAC (Fine Needle Aspiration Cytology) | I. Yes <input type="checkbox"/><br>II. No <input type="checkbox"/> |
| c. | Clinical Breast Examination by a doctor                                                   | I. Yes <input type="checkbox"/><br>II. NO <input type="checkbox"/> |
| d. | Mammography                                                                               | I. Yes <input type="checkbox"/><br>II. No <input type="checkbox"/> |

10. Do you know how often SBE should be done (Tick the answer you think is right)

- a) monthly ☐
- b) Twice a year ☐
- c) Once a year ☐
- d) Don't Know ☐

11. Which of these methods use when you practicing Breast self- examination?

- a) In front of mirror ☐
- b) During shower ☐
- c) Lying down ☐
- d) None of them ☐

12. What motion do you use in examination of your breast?

- a) Circular ☐
- b) Wedge ☐
- c) None ☐

13. Do you know the recommended age for a mammography examination to start?

- a) At the age of 30 ☐
- b) At 35 ☐
- c) At 45-year ☐
- d) Don't know ☐

14. Do you often do/participate in some prevention methods for the people

- a) yes ☐
- b) no ☐

15. If yes which methods

- a) Self-breast examination ☐
- b) Pathological examination of breast tissue by using FNAC (Fine Needle Aspiration Cytology) ☐
- c) Clinical Breast Examination by a doctor ☐
- d) Mammography ☐

**End!**
